# Supplementary material for: Work/household, transport, and leisure domains account for the sex gap in physical activity in Chile
Source: PubMed Central journal article supplement (PMC9554212; doi:10.3389/fpubh.2022.1011790), 2022-09-28
Supplement: Data_Sheet_1.pdf [file Data_Sheet_1.pdf]

**Supplementary Table 1.** STROBE checklist for reports of cross-sectional studies.

|                              | <b>Item No</b> | <b>Recommendation</b>                                                                                                                                                                             | <b>Section</b>                                                     |
|------------------------------|----------------|---------------------------------------------------------------------------------------------------------------------------------------------------------------------------------------------------|--------------------------------------------------------------------|
| <b>Title and abstract</b>    | 1              | (a) Indicate the study's design with a commonly used term in the title or the abstract                                                                                                            | Abstract                                                           |
|                              |                | (b) Provide in the abstract an informative and balanced summary of what was done and what was found                                                                                               | Abstract                                                           |
| <b>Introduction</b>          |                |                                                                                                                                                                                                   |                                                                    |
| Background/rationale         | 2              | Explain the scientific background and rationale for the investigation being reported                                                                                                              | Introduction, 1st to 3rd paragraph                                 |
| Objectives                   | 3              | State specific objectives, including any prespecified hypotheses                                                                                                                                  | Introduction, 4th paragraph                                        |
| <b>Methods</b>               |                |                                                                                                                                                                                                   |                                                                    |
| Study design                 | 4              | Present key elements of study design early in the paper                                                                                                                                           | Methods, sub-section                                               |
| Setting                      | 5              | Describe the setting, locations, and relevant dates, including periods of recruitment, exposure, follow-up, and data collection                                                                   | "Design and setting"                                               |
| Participants                 | 6              | (a) Give the eligibility criteria, and the sources and methods of selection of participants                                                                                                       | Methods, sub-section "Participants"                                |
| Variables                    | 7              | Clearly define all outcomes, exposures, predictors, potential confounders, and effect modifiers. Give diagnostic criteria, if applicable                                                          | Methods, sub-sections "Sociodemographic data" and "MVPA by domain" |
| Data sources/<br>measurement | 8*             | For each variable of interest, give sources of data and details of methods of assessment (measurement). Describe comparability of assessment methods if there is more than one group              |                                                                    |
| Bias                         | 9              | Describe any efforts to address potential sources of bias                                                                                                                                         | -                                                                  |
| Study size                   | 10             | Explain how the study size was arrived at                                                                                                                                                         | Methods, sub-section "Design and setting"                          |
| Quantitative variables       | 11             | Explain how quantitative variables were handled in the analyses. If applicable, describe which groupings were chosen and why                                                                      | Methods, sub-section "Statistics"                                  |
| Statistical methods          | 12             | (a) Describe all statistical methods, including those used to control for confounding                                                                                                             |                                                                    |
|                              |                | (b) Describe any methods used to examine subgroups and interactions                                                                                                                               |                                                                    |
|                              |                | (c) Explain how missing data were addressed                                                                                                                                                       | Methods, sub-section "Sociodemographic data"                       |
|                              |                | (d) If applicable, describe analytical methods taking account of sampling strategy                                                                                                                | Methods, sub-section "Design and setting"                          |
|                              |                | (e) Describe any sensitivity analyses                                                                                                                                                             | -                                                                  |
| <b>Results</b>               |                |                                                                                                                                                                                                   |                                                                    |
| Participants                 | 13*            | (a) Report numbers of individuals at each stage of study—eg numbers potentially eligible, examined for eligibility, confirmed eligible, included in the study, completing follow-up, and analysed | Results, sub-section "General characteristics of participants"     |
|                              |                | (b) Give reasons for non-participation at each stage                                                                                                                                              |                                                                    |
|                              |                | (c) Consider use of a flow diagram                                                                                                                                                                | -                                                                  |

|                          |     |                                                                                                                                                                                                                                                                                                                                                                                                                           |                                                                                                                                                                                        |
|--------------------------|-----|---------------------------------------------------------------------------------------------------------------------------------------------------------------------------------------------------------------------------------------------------------------------------------------------------------------------------------------------------------------------------------------------------------------------------|----------------------------------------------------------------------------------------------------------------------------------------------------------------------------------------|
| Descriptive data         | 14* | (a) Give characteristics of study participants (eg demographic, clinical, social) and information on exposures and potential confounders<br><hr/> (b) Indicate number of participants with missing data for each variable of interest                                                                                                                                                                                     | Results, sub-section "General characteristics of participants" and Table 1                                                                                                             |
| Outcome data             | 15* | Report numbers of outcome events or summary measures                                                                                                                                                                                                                                                                                                                                                                      | Results and Figures 1-3                                                                                                                                                                |
| Main results             | 16  | (a) Give unadjusted estimates and, if applicable, confounder-adjusted estimates and their precision (eg, 95% confidence interval). Make clear which confounders were adjusted for and why they were included<br><hr/> (b) Report category boundaries when continuous variables were categorized<br><hr/> (c) If relevant, consider translating estimates of relative risk into absolute risk for a meaningful time period | Results, sub-section "MVPA by domain including all selected participants" and Figure 1<br><hr/> Methods, sub-sections "Sociodemographic data" and "MVPA by domain"<br><hr/> -          |
| Other analyses           | 17  | Report other analyses done—eg analyses of subgroups and interactions, and sensitivity analyses                                                                                                                                                                                                                                                                                                                            | Results, sub-sections "MVPA by domain including only participants with some MVPA" and "MVPA by domain including only participants categorized as active", and Supplementary Tables 2-4 |
| <b>Discussion</b>        |     |                                                                                                                                                                                                                                                                                                                                                                                                                           |                                                                                                                                                                                        |
| Key results              | 18  | Summarise key results with reference to study objectives                                                                                                                                                                                                                                                                                                                                                                  | Discussion, 1st paragraph                                                                                                                                                              |
| Limitations              | 19  | Discuss limitations of the study, taking into account sources of potential bias or imprecision. Discuss both direction and magnitude of any potential bias                                                                                                                                                                                                                                                                | Discussion, 6th paragraph                                                                                                                                                              |
| Interpretation           | 20  | Give a cautious overall interpretation of results considering objectives, limitations, multiplicity of analyses, results from similar studies, and other relevant evidence                                                                                                                                                                                                                                                | Discussion, 7th paragraph                                                                                                                                                              |
| Generalisability         | 21  | Discuss the generalisability (external validity) of the study results                                                                                                                                                                                                                                                                                                                                                     | Discussion, 7th paragraph                                                                                                                                                              |
| <b>Other information</b> |     |                                                                                                                                                                                                                                                                                                                                                                                                                           |                                                                                                                                                                                        |
| Funding                  | 22  | Give the source of funding and the role of the funders for the present study and, if applicable, for the original study on which the present article is based                                                                                                                                                                                                                                                             | Funding                                                                                                                                                                                |

**Supplementary Table 2.** Comparison of moderate-vigorous physical activity (MVPA) levels between all selected men (n = 1,812) and women (n = 3,244), stratified by age.

| MVPA                            | Men               |        |                 |                 | Women             |        |                 |                 | P-value |
|---------------------------------|-------------------|--------|-----------------|-----------------|-------------------|--------|-----------------|-----------------|---------|
|                                 | Mean or frequency | Median | 25th percentile | 75th percentile | Mean or frequency | Median | 25th percentile | 75th percentile |         |
| <b>18 to &lt;25 years</b>       |                   |        |                 |                 |                   |        |                 |                 |         |
| n                               | 204               | -      | -               | -               | 289               | -      | -               | -               | -       |
| All domains, MET×min/week       | 7,239             | 3,360  | 1,090           | 9,600           | 3,424             | 1,200  | 170             | 4,320           | <0.001  |
| At work/household, MET×min/week | 3,612             | 0      | 0               | 2,760           | 1,884             | 0      | 0               | 480             | 0.019   |
| For transport, MET×min/week     | 2,073             | 960    | 300             | 2,400           | 1,047             | 480    | 0               | 1,200           | <0.001  |
| For leisure, MET×min/week       | 1,554             | 480    | 0               | 2,160           | 493               | 0      | 0               | 480             | <0.001  |
| Categories                      |                   |        |                 |                 |                   |        |                 |                 |         |
| <i>No MVPA, %</i>               | 8.3               | -      | -               | -               | 23.2              | -      | -               | -               | <0.001  |
| <i>Insufficiently active, %</i> | 6.9               | -      | -               | -               | 14.5              | -      | -               | -               | -       |
| <i>Active, %</i>                | 84.8              | -      | -               | -               | 62.3              | -      | -               | -               | -       |
| <b>25 to &lt;45 years</b>       |                   |        |                 |                 |                   |        |                 |                 |         |
| n                               | 527               | -      | -               | -               | 974               | -      | -               | -               | -       |
| All domains, MET×min/week       | 8,037             | 3,660  | 840             | 11,520          | 4,442             | 1,270  | 144             | 5,610           | <0.001  |
| At work/household, MET×min/week | 5,113             | 0      | 0               | 7,200           | 2,633             | 0      | 0               | 1,920           | <0.001  |
| For transport, MET×min/week     | 1,918             | 600    | 0               | 1,680           | 1,325             | 420    | 0               | 1,200           | 0.002   |
| For leisure, MET×min/week       | 1,007             | 0      | 0               | 1,440           | 484               | 0      | 0               | 0               | <0.001  |
| Categories                      |                   |        |                 |                 |                   |        |                 |                 |         |
| <i>No MVPA, %</i>               | 13.5              | -      | -               | -               | 24.3              | -      | -               | -               | <0.001  |
| <i>Insufficiently active, %</i> | 7.2               | -      | -               | -               | 12.1              | -      | -               | -               | -       |
| <i>Active, %</i>                | 79.3              | -      | -               | -               | 63.6              | -      | -               | -               | -       |
| <b>45 to &lt;65 years</b>       |                   |        |                 |                 |                   |        |                 |                 |         |
| n                               | 618               | -      | -               | -               | 1,151             | -      | -               | -               | -       |
| All domains, MET×min/week       | 8,256             | 3,360  | 480             | 12,650          | 4,232             | 1,200  | 0               | 5,760           | <0.001  |
| At work/household, MET×min/week | 5,989             | 0      | 0               | 9,600           | 2,648             | 0      | 0               | 1,952           | <0.001  |
| For transport, MET×min/week     | 1,930             | 600    | 0               | 1,920           | 1,377             | 360    | 0               | 1,440           | <0.001  |
| For leisure, MET×min/week       | 337               | 0      | 0               | 0               | 207               | 0      | 0               | 0               | <0.001  |
| Categories                      |                   |        |                 |                 |                   |        |                 |                 |         |
| <i>No MVPA, %</i>               | 18.1              | -      | -               | -               | 27.3              | -      | -               | -               | <0.001  |
| <i>Insufficiently active, %</i> | 7.8               | -      | -               | -               | 11.9              | -      | -               | -               | -       |
| <i>Active, %</i>                | 74.1              | -      | -               | -               | 60.8              | -      | -               | -               | -       |
| <b>≥65 years</b>                |                   |        |                 |                 |                   |        |                 |                 |         |
| n                               | 463               | -      | -               | -               | 830               | -      | -               | -               | -       |
| All domains, MET×min/week       | 3,467             | 840    | 0               | 3,600           | 2,178             | 480    | 0               | 2,214           | <0.001  |
| At work/household, MET×min/week | 1,831             | 0      | 0               | 0               | 1,054             | 0      | 0               | 0               | 0.263   |
| For transport, MET×min/week     | 1,355             | 560    | 0               | 1,680           | 967               | 200    | 0               | 960             | <0.001  |
| For leisure, MET×min/week       | 282               | 0      | 0               | 0               | 157               | 0      | 0               | 0               | 0.083   |
| Categories                      |                   |        |                 |                 |                   |        |                 |                 |         |
| <i>No MVPA, %</i>               | 25.5              | -      | -               | -               | 37.2              | -      | -               | -               | <0.001  |
| <i>Insufficiently active, %</i> | 14.3              | -      | -               | -               | 16.4              | -      | -               | -               | -       |
| <i>Active, %</i>                | 60.3              | -      | -               | -               | 46.4              | -      | -               | -               | -       |

**Supplementary Table 3.** Comparison of moderate-vigorous physical activity (MVPA) levels between men (n = 1,494) and women (n = 2,317) that reported some MVPA, stratified by age.

| MVPA                            | Men               |        |                 |                 | Women             |        |                 |                 | P-value |
|---------------------------------|-------------------|--------|-----------------|-----------------|-------------------|--------|-----------------|-----------------|---------|
|                                 | Mean or frequency | Median | 25th percentile | 75th percentile | Mean or frequency | Median | 25th percentile | 75th percentile |         |
| 18 to <25 years                 |                   |        |                 |                 |                   |        |                 |                 |         |
| n                               | 187               | -      | -               | -               | 222               | -      | -               | -               | -       |
| All domains, MET×min/week       | 7,897             | 4,780  | 1,680           | 10,560          | 4,458             | 2,000  | 840             | 5,800           | <0.001  |
| At work/household, MET×min/week | 3,941             | 0      | 0               | 3,360           | 2,453             | 0      | 0               | 2,400           | 0.237   |
| For transport, MET×min/week     | 2,261             | 1,200  | 420             | 2,880           | 1,363             | 600    | 300             | 1,680           | <0.001  |
| For leisure, MET×min/week       | 1,695             | 720    | 0               | 2,400           | 642               | 0      | 0               | 720             | <0.001  |
| At work/household, %            | 23.9              | 0.0    | 0.0             | 48.6            | 25.9              | 0.0    | 0.0             | 60.4            | 0.955   |
| For transport, %                | 46.2              | 35.7   | 10.9            | 100.0           | 55.5              | 53.8   | 12.3            | 100.0           | 0.038   |
| For leisure, %                  | 29.9              | 17.5   | 0.0             | 55.9            | 18.6              | 0.0    | 0.0             | 30.0            | <0.001  |
| 25 to <45 years                 |                   |        |                 |                 |                   |        |                 |                 |         |
| n                               | 456               | -      | -               | -               | 737               | -      | -               | -               | -       |
| All domains, MET×min/week       | 9,289             | 5,400  | 1,643           | 13,675          | 5,870             | 2,800  | 840             | 7,780           | <0.001  |
| At work/household, MET×min/week | 5,909             | 330    | 0               | 9,600           | 3,480             | 0      | 0               | 3,840           | <0.001  |
| For transport, MET×min/week     | 2,216             | 840    | 0               | 2,495           | 1,751             | 720    | 280             | 1,680           | 0.265   |
| For leisure, MET×min/week       | 1,163             | 310    | 0               | 1,440           | 640               | 0      | 0               | 480             | <0.001  |
| At work/household, %            | 38.8              | 16.2   | 0.0             | 83.7            | 31.0              | 0.0    | 0.0             | 74.8            | 0.001   |
| For transport, %                | 37.1              | 20.0   | 0.0             | 76.7            | 54.5              | 51.2   | 7.9             | 100.0           | <0.001  |
| For leisure, %                  | 24.1              | 3.2    | 0.0             | 39.2            | 14.5              | 0.0    | 0.0             | 12.5            | <0.001  |
| 45 to <65 years                 |                   |        |                 |                 |                   |        |                 |                 |         |
| n                               | 506               | -      | -               | -               | 837               | -      | -               | -               | -       |
| All domains, MET×min/week       | 10,084            | 5,880  | 1,680           | 15,125          | 5,820             | 2,880  | 840             | 8,400           | <0.001  |
| At work/household, MET×min/week | 7,315             | 1,860  | 0               | 12,360          | 3,641             | 0      | 0               | 5,040           | <0.001  |
| For transport, MET×min/week     | 2,357             | 840    | 240             | 3,360           | 1,893             | 812    | 280             | 1,680           | 0.091   |
| For leisure, MET×min/week       | 412               | 0      | 0               | 240             | 285               | 0      | 0               | 0               | <0.001  |
| At work/household, %            | 46.1              | 50.0   | 0.0             | 92.8            | 36.4              | 0.0    | 0.0             | 85.6            | <0.001  |
| For transport, %                | 44.0              | 30.4   | 3.0             | 100.0           | 56.2              | 63.6   | 7.7             | 100.0           | <0.001  |
| For leisure, %                  | 10.0              | 0.0    | 0.0             | 2.3             | 7.4               | 0.0    | 0.0             | 0.0             | <0.001  |
| ≥65 years                       |                   |        |                 |                 |                   |        |                 |                 |         |
| n                               | 345               | -      | -               | -               | 521               | -      | -               | -               | -       |
| All domains, MET×min/week       | 4,653             | 1,680  | 720             | 5,760           | 3,470             | 1,680  | 560             | 4,200           | 0.044   |
| At work/household, MET×min/week | 2,457             | 0      | 0               | 1,560           | 1,680             | 0      | 0               | 860             | 0.798   |
| For transport, MET×min/week     | 1,818             | 840    | 410             | 1,920           | 1,540             | 700    | 240             | 1,680           | 0.010   |
| For leisure, MET×min/week       | 378               | 0      | 0               | 0               | 250               | 0      | 0               | 0               | 0.498   |
| At work/household, %            | 23.7              | 0.0    | 0.0             | 50.0            | 25.7              | 0.0    | 0.0             | 50.9            | 0.284   |
| For transport, %                | 68.3              | 100.0  | 28.3            | 100.0           | 66.5              | 100.0  | 25.0            | 100.0           | 0.613   |
| For leisure, %                  | 8.0               | 0.0    | 0.0             | 0.0             | 7.8               | 0.0    | 0.0             | 0.0             | 0.623   |

**Supplementary Table 4.** Comparison of moderate-vigorous physical activity (MVPA) levels between men (n = 1,328) and women (n = 1,884) categorized as active, stratified by age.

| MVPA                            | Men               |        |                 |                 | Women             |        |                 |                 | P-value |
|---------------------------------|-------------------|--------|-----------------|-----------------|-------------------|--------|-----------------|-----------------|---------|
|                                 | Mean or frequency | Median | 25th percentile | 75th percentile | Mean or frequency | Median | 25th percentile | 75th percentile |         |
| 18 to <25 years                 |                   |        |                 |                 |                   |        |                 |                 |         |
| n                               | 173               | -      | -               | -               | 180               | -      | -               | -               | -       |
| All domains, MET×min/week       | 8,505             | 5,496  | 1,920           | 11,490          | 5,414             | 3,240  | 1,440           | 7,290           | 0.001   |
| At work/household, MET×min/week | 4,257             | 0      | 0               | 4,560           | 3,022             | 0      | 0               | 3,780           | 0.781   |
| For transport, MET×min/week     | 2,421             | 1,200  | 600             | 3,360           | 1,604             | 840    | 485             | 1,680           | 0.007   |
| For leisure, MET×min/week       | 1,827             | 960    | 0               | 2,760           | 788               | 0      | 0               | 960             | <0.001  |
| At work/household, %            | 25.2              | 0.0    | 0.0             | 53.5            | 31.4              | 0.0    | 0.0             | 73.7            | 0.285   |
| For transport, %                | 43.6              | 33.3   | 10.0            | 90.0            | 46.9              | 36.3   | 7.2             | 100.0           | 0.63    |
| For leisure, %                  | 31.2              | 22.2   | 0.0             | 56.3            | 21.7              | 0.0    | 0.0             | 40.1            | 0.001   |
| 25 to <45 years                 |                   |        |                 |                 |                   |        |                 |                 |         |
| n                               | 418               | -      | -               | -               | 619               | -      | -               | -               | -       |
| All domains, MET×min/week       | 10,102            | 6,420  | 2,160           | 15,120          | 6,921             | 3,720  | 1,620           | 9,120           | <0.001  |
| At work/household, MET×min/week | 6,440             | 1,320  | 0               | 10,080          | 4,141             | 0      | 0               | 5,760           | 0.001   |
| For transport, MET×min/week     | 2,402             | 996    | 150             | 3,000           | 2,026             | 840    | 400             | 1,680           | 0.400   |
| For leisure, MET×min/week       | 1,260             | 480    | 0               | 1,680           | 755               | 0      | 0               | 720             | <0.001  |
| At work/household, %            | 40.6              | 26.7   | 0.0             | 84.0            | 36.3              | 0.0    | 0.0             | 81.1            | 0.084   |
| For transport, %                | 35.8              | 20.0   | 1.0             | 69.8            | 48.3              | 34.1   | 5.5             | 100.0           | <0.001  |
| For leisure, %                  | 23.6              | 4.4    | 0.0             | 37.9            | 15.4              | 0.0    | 0.0             | 17.5            | <0.001  |
| 45 to <65 years                 |                   |        |                 |                 |                   |        |                 |                 |         |
| n                               | 458               | -      | -               | -               | 700               | -      | -               | -               | -       |
| All domains, MET×min/week       | 11,105            | 7,200  | 2,400           | 16,800          | 6,894             | 4,020  | 1,680           | 9,354           | <0.001  |
| At work/household, MET×min/week | 8,077             | 3,360  | 0               | 13,440          | 4,349             | 720    | 0               | 6,000           | <0.001  |
| For transport, MET×min/week     | 2,577             | 1,160  | 360             | 3,360           | 2,208             | 960    | 400             | 2,520           | 0.347   |
| For leisure, MET×min/week       | 451               | 0      | 0               | 330             | 337               | 0      | 0               | 0               | 0.001   |
| At work/household, %            | 49.7              | 60.0   | 0.0             | 94.3            | 42.0              | 33.3   | 0.0             | 90.2            | 0.007   |
| For transport, %                | 40.8              | 25.0   | 3.0             | 98.7            | 50.3              | 41.2   | 5.6             | 100.0           | <0.001  |
| For leisure, %                  | 9.5               | 0.0    | 0.0             | 3.8             | 7.6               | 0.0    | 0.0             | 0.0             | 0.005   |
| ≥65 years                       |                   |        |                 |                 |                   |        |                 |                 |         |
| n                               | 279               | -      | -               | -               | 385               | -      | -               | -               | -       |
| All domains, MET×min/week       | 5,674             | 2,400  | 1,020           | 7,220           | 4,587             | 2,520  | 1,320           | 5,620           | 0.858   |
| At work/household, MET×min/week | 3,031             | 0      | 0               | 3,360           | 2,261             | 0      | 0               | 2,040           | 0.767   |
| For transport, MET×min/week     | 2,175             | 1,200  | 720             | 2,520           | 1,995             | 1,120  | 560             | 2,400           | 0.233   |
| For leisure, MET×min/week       | 468               | 0      | 0               | 0               | 330               | 0      | 0               | 0               | 0.479   |
| At work/household, %            | 27.2              | 0.0    | 0.0             | 63.2            | 30.8              | 0.0    | 0.0             | 73.8            | 0.208   |
| For transport, %                | 62.9              | 77.8   | 23.8            | 100.0           | 60.7              | 71.4   | 17.0            | 100.0           | 0.646   |
| For leisure, %                  | 9.9               | 0.0    | 0.0             | 0.0             | 8.6               | 0.0    | 0.0             | 0.0             | 0.486   |

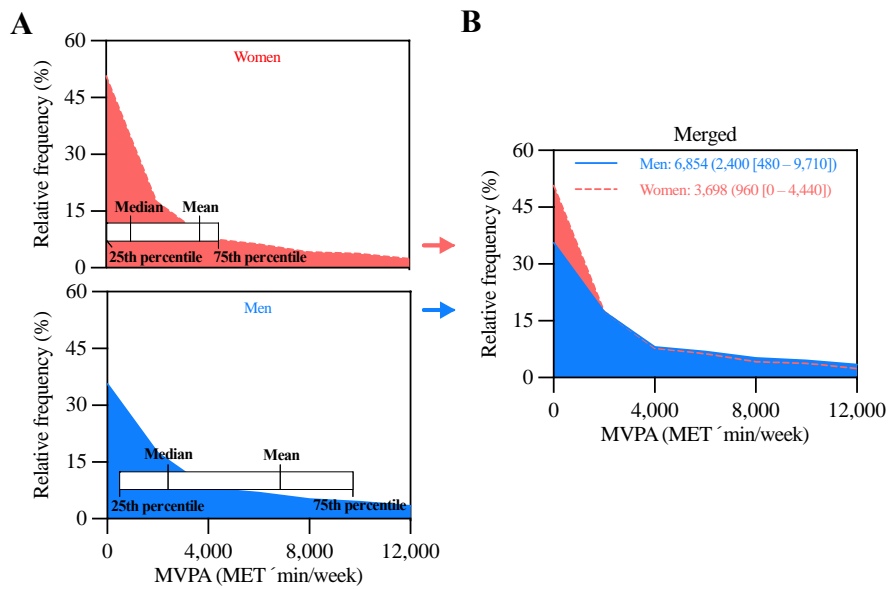

**Supplementary Figure 1.** Comparing highly skewed data using histograms of relative frequencies. (A) The histograms show the relative frequency distribution of participants (in %;  $y$ -axis) as a function of the level of moderate-vigorous physical activity (MVPA, in  $\text{MET} \times \text{min}/\text{week}$ ;  $x$ -axis). The more skewed the histogram to the left, the lower the MVPA of participants. This is because such a pattern indicates that a larger proportion of participants has low MVPA values. The mean, median, 25th percentile, and 75th percentile shown in the figure help summarize the pattern. In the example, data for women are more skewed to the left than data for men. Thus, there is a larger proportion of women with low MVPA values compared to men. This difference manifests in lower mean, median, 25th percentile, and 75th percentile in women than in men. (B) To compare the data between men and women in the manuscript, we merged the histograms, and presented the data as: mean (median [25th percentile – 75th percentile]).

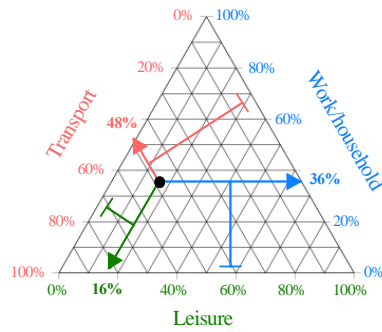

**Supplementary Figure 2.** Reading ternary plots of the relative contribution to total moderate-vigorous physical activity (MVPA) by domains. Ternary plots summarize the values of three variables whose sum is constant. In the context of physical activity, MVPA can be conducted at work/household, for transport, and for leisure. The sum of the MVPA in these three domains results in the total MVPA. Thus, each domain contributes a certain proportion (%) to the total MVPA (the 100%). The plot shows how to read the data for a group represented by the circle. For MVPA at work/household, with an arrow running parallel to the  $x$ -axis. For MVPA for transport, with an arrow running parallel to the right-hand axis. And for MVPA for leisure, with an arrow running parallel to the left-hand axis. In the example, the relative contribution to total MVPA is 36% for work/household, 48% for transport, and 16% for leisure domains.
